# Supplementary material for: lncRNA SNHG3 acts as a novel Tumor Suppressor and regulates Tumor Proliferation and Metastasis via AKT/mTOR/ERK pathway in Papillary Thyroid Carcinoma
Source: PubMed Central journal article supplement (PMC7150443; doi:10.7150/jca.42070), 2020-03-15
Supplement: jcav11p3492s1.pdf [file jcav11p3492s1.pdf]

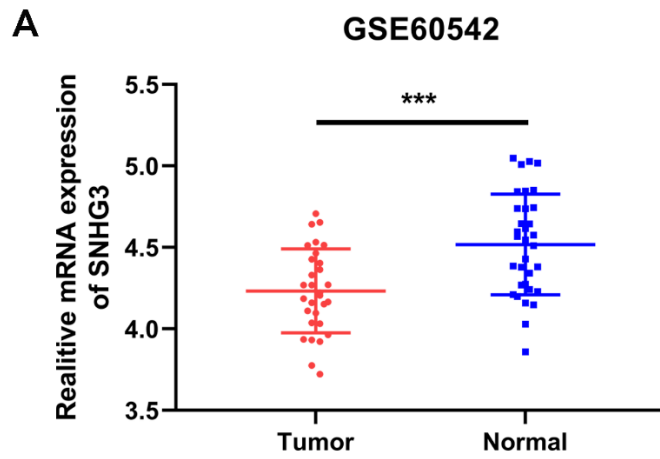

**Supplementary Figure 1.** (A) Bioinformatics analysis of SLC34A2 mRNA expression on the basis of the GSE60542 confirmed the silenced expression of SNHG3 in PTC tissues.

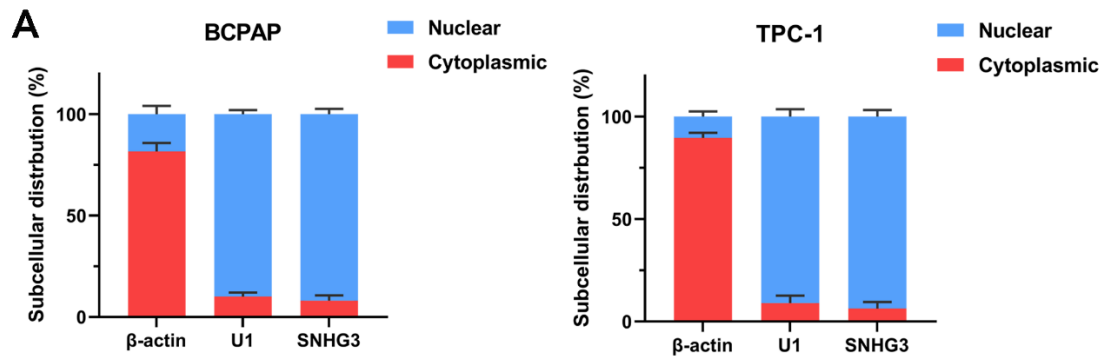

**Supplementary Figure 2.** (A) The cellular distribution of SNHG3 in BCPAP and TPC-1 cells.  $\beta$ -actin was used as the cytoplasmic internal control and U1 served as the nuclear internal control.

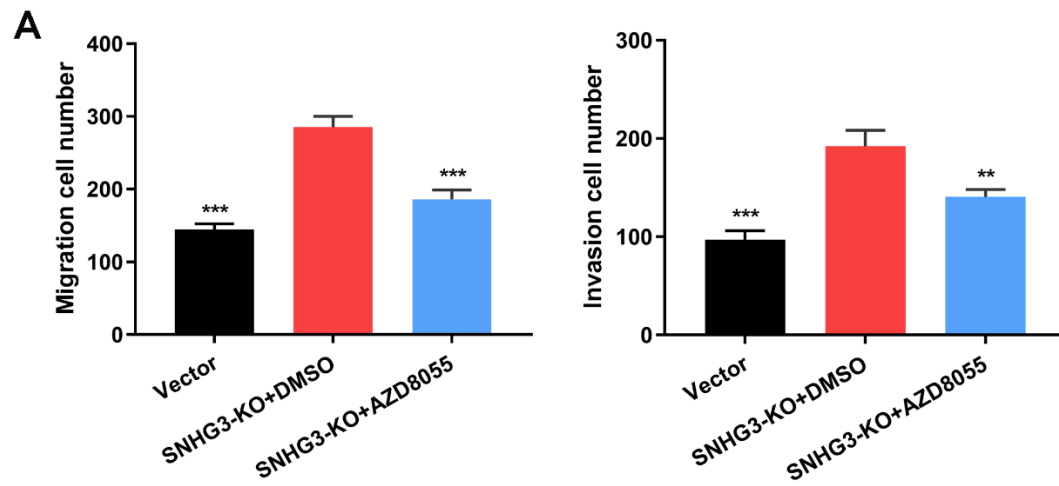

**Supplementary Figure 3.** (A) The quantification results of transwell migration and invasion assays in control group and SNHG3-KO group treated with DMSO or AZD8055. \*\*P < 0.01, \*\*\*P < 0.001.
